# Supplementary material for: Effectiveness of Body Roundness Index (BRI) and a Body Shape Index (ABSI) in Predicting Hypertension: A Systematic Review and Meta-Analysis of Observational Studies
Source: MDPI journal article supplement (doi:10.3390/ijerph182111607), 2021-11-04
Supplement: s1 [file s1]

**Table S1.** Quality assessment of studies included in the review

| Study ID                                           | Criteria                                                                                                                                                                                                                                    | 1  | 2  | 3  | 4  | 5  | 6  | 7  | 8  | 9  | 10 | 11 | 12 | 13 |
|----------------------------------------------------|---------------------------------------------------------------------------------------------------------------------------------------------------------------------------------------------------------------------------------------------|----|----|----|----|----|----|----|----|----|----|----|----|----|
| 1.                                                 | Was the research question or objective in this paper clearly stated?                                                                                                                                                                        | Y  | Y  | Y  | Y  | Y  | Y  | Y  | Y  | Y  | Y  | Y  | Y  | Y  |
| 2.                                                 | Was the study population clearly specified and defined?                                                                                                                                                                                     | Y  | Y  | Y  | Y  | Y  | Y  | Y  | Y  | Y  | Y  | Y  | Y  | Y  |
| 3.                                                 | Was the participation rate of eligible persons at least 50%?                                                                                                                                                                                | Y  | Y  | Y  | Y  | N  | Y  | Y  | Y  | Y  | Y  | Y  | Y  | Y  |
| 4.                                                 | Were the all the subjects selected or recruited from the same or similar population (including the same time period)? Were inclusion and exclusion criteria for being in the study pre-specified and applied uniformly to all participants? | Y  | Y  | Y  | Y  | Y  | Y  | Y  | Y  | Y  | Y  | Y  | Y  | Y  |
| 5.                                                 | Was a simple size justification, power description or variance and effect estimates provided?                                                                                                                                               | N  | N  | N  | N  | N  | N  | N  | Y  | N  | N  | N  | N  | N  |
| 6.                                                 | For the analysis in this paper, were the exposure(s) of interest measured prior to the outcome(s) being measured?                                                                                                                           | N  | N  | N  | N  | Y  | N  | N  | N  | N  | N  | N  | N  | N  |
| 7.                                                 | Was the timeframe sufficient so that one could reasonably expect to see an association between exposure and outcome if it existed?                                                                                                          | N  | N  | N  | N  | Y  | N  | N  | N  | N  | N  | N  | N  | N  |
| 8.                                                 | For exposures that can vary in amount or level, did the study examine different levels of the exposure as related to the outcome (e.g categories of exposure or exposure measured as continuous variable)?                                  | Y  | Y  | Y  | Y  | Y  | Y  | Y  | Y  | Y  | Y  | Y  | Y  | Y  |
| 9.                                                 | Were the exposure measures (independent variable) clearly defined, valid, reliable and implemented consistently across all study participant?                                                                                               | Y  | Y  | Y  | Y  | Y  | Y  | Y  | Y  | Y  | Y  | Y  | Y  | Y  |
| 10.                                                | Was the exposure(s) assessed more than once over time?                                                                                                                                                                                      | N  | N  | N  | N  | Y  | N  | N  | N  | N  | N  | N  | N  | N  |
| 11.                                                | Were the outcome measures (dependent variables) clearly defined, valid reliable and implemented consistently across all study participants?                                                                                                 | Y  | Y  | Y  | Y  | Y  | Y  | Y  | Y  | Y  | Y  | Y  | Y  | Y  |
| 12.                                                | Were the outcome assessors blinded to the exposure status of participants?                                                                                                                                                                  | Y  | Y  | Y  | Y  | Y  | Y  | Y  | Y  | Y  | Y  | Y  | Y  | Y  |
| 13.                                                | Was loss to follow-up after baseline 20% or less?                                                                                                                                                                                           | CD | CD | CD | CD | Y  | CD |
| 14.                                                | Were key potential confounding variables measured and adjusted statistically for their impact relationship between exposure(s) and outcome(s)?                                                                                              | N  | Y  | N  | Y  | Y  | N  | N  | N  | Y  | Y  | Y  | N  | Y  |
| Sum of SCOREs                                      |                                                                                                                                                                                                                                             | 8  | 9  | 8  | 9  | 12 | 8  | 8  | 9  | 9  | 9  | 9  | 8  | 9  |
| Abbreviations: CD: cannot determine, N: no; Y: Yes |                                                                                                                                                                                                                                             |    |    |    |    |    |    |    |    |    |    |    |    |    |

**Table S2.** Baseline sensitivity and specificity data of included studies.

|                                                                                                                                                                                                                                                                                           |                | MEN      |       |       |      |       |      |       | WOMEN    |       |       |      |       |      |      |
|-------------------------------------------------------------------------------------------------------------------------------------------------------------------------------------------------------------------------------------------------------------------------------------------|----------------|----------|-------|-------|------|-------|------|-------|----------|-------|-------|------|-------|------|------|
|                                                                                                                                                                                                                                                                                           | Study          | Cutt-off | Sen   | Spe   | TP   | TN    | FN   | FP    | Cutt-off | Sen   | Spe   | TP   | TN    | FN   | FP   |
| BRI                                                                                                                                                                                                                                                                                       | Baveicy K 2020 | 4.690    | 0.636 | 0.545 | 380  | 2177  | 217  | 1817  | 6.050    | 0.637 | 0.501 | 495  | 1713  | 282  | 1709 |
|                                                                                                                                                                                                                                                                                           | Gluszek S 2020 | 4.855    | 0.538 | 0.677 | 1814 | 489   | 1558 | 233   | 4.931    | 0.635 | 0.566 | 3660 | 1398  | 2104 | 1072 |
|                                                                                                                                                                                                                                                                                           | Liu PJ 2017    | 2.800    | 0.545 | 0.600 | 163  | 247   | 136  | 165   | 2.600    | 0.542 | 0.645 | 104  | 447   | 88   | 246  |
|                                                                                                                                                                                                                                                                                           | Zhang J 2018   | 3.810    | 0.665 | 0.614 | 4913 | 17628 | 2475 | 11082 | 3,330    | 0.717 | 0.694 | 1994 | 13984 | 787  | 6166 |
| ABSI                                                                                                                                                                                                                                                                                      | Baveicy K 2020 | 0.1300   | 0.602 | 0.425 | 359  | 1697  | 238  | 2297  | 0.1400   | 0.557 | 0.500 | 433  | 1711  | 344  | 1711 |
|                                                                                                                                                                                                                                                                                           | Gluszek S 2020 | 0.0830   | 0.346 | 0.715 | 1167 | 516   | 2205 | 206   | 0.0780   | 0.383 | 0.727 | 2208 | 1796  | 3556 | 674  |
|                                                                                                                                                                                                                                                                                           | Liu PJ 2017    | -        | -     | -     | -    | -     | -    | -     | 0.0742   | 0.589 | 0.577 | 113  | 400   | 79   | 293  |
|                                                                                                                                                                                                                                                                                           | Zhang J 2018   | 0.079    | 0.604 | 0.523 | 4462 | 15015 | 2926 | 13695 | 0.0758   | 0.682 | 0.537 | 1897 | 10821 | 884  | 9329 |
| BMI                                                                                                                                                                                                                                                                                       | Baveicy K 2020 | -        | -     | -     | -    | -     | -    | -     | -        | -     | -     | -    | -     | -    | -    |
|                                                                                                                                                                                                                                                                                           | Gluszek S 2020 | 27.18    | 0.651 | 0.594 | 2195 | 429   | 1177 | 293   | 28.44    | 0.488 | 0.783 | 2813 | 1934  | 2951 | 536  |
|                                                                                                                                                                                                                                                                                           | Liu PJ 2017    | -        | -     | -     | -    | -     | -    | -     | -        | -     | -     | -    | -     | -    | -    |
|                                                                                                                                                                                                                                                                                           | Zhang J 2018   | 24.75    | 0.705 | 0.542 | 5209 | 15561 | 2179 | 13149 | 23.18    | 0.704 | 0.663 | 1958 | 13359 | 823  | 6791 |
| WC                                                                                                                                                                                                                                                                                        | Baveicy K 2020 | -        | -     | -     | -    | -     | -    | -     | -        | -     | -     | -    | -     | -    | -    |
|                                                                                                                                                                                                                                                                                           | Gluszek S 2020 | 98.00    | 0.346 | 0.715 | 1167 | 516   | 2205 | 206   | 88.00    | 0.564 | 0.712 | 3251 | 1759  | 2513 | 711  |
|                                                                                                                                                                                                                                                                                           | Liu PJ 2017    | -        | -     | -     | -    | -     | -    | -     | -        | -     | -     | -    | -     | -    | -    |
|                                                                                                                                                                                                                                                                                           | Zhang J 2018   | 82.25    | 0.662 | 0.584 | 4891 | 16767 | 2497 | 11943 | 78.20    | 0.706 | 0.647 | 1963 | 13037 | 818  | 7113 |
| WhtR                                                                                                                                                                                                                                                                                      | Baveicy K 2020 | -        | -     | -     | -    | -     | -    | -     | -        | -     | -     | -    | -     | -    | -    |
|                                                                                                                                                                                                                                                                                           | Gluszek S 2020 | 0.56     | 0.582 | 0.647 | 1963 | 467   | 1409 | 255   | 0.54     | 0.631 | 0.649 | 3637 | 1603  | 2127 | 867  |
|                                                                                                                                                                                                                                                                                           | Liu PJ 2017    | 0.47     | 0.681 | 0.459 | 204  | 189   | 95   | 223   | 0.47     | 0.438 | 0.733 | 84   | 508   | 108  | 185  |
|                                                                                                                                                                                                                                                                                           | Zhang J 2018   | 0.52     | 0.665 | 0.614 | 4913 | 17628 | 2475 | 11082 | 0.50     | 0.715 | 0.694 | 1988 | 13984 | 793  | 6166 |
| Abbreviation: ABSI: A Body Shape Index; BMI: Body Mass Index; BRI: Body Roundness Index; FN: False negative value; FP: False positive value ; Sen; Sensitivity; Spe: Specificity; TP: True positive value; TN: True negative value; WC: Waist circumference; WhtR: Waist-to-Height Ratio. |                |          |       |       |      |       |      |       |          |       |       |      |       |      |      |

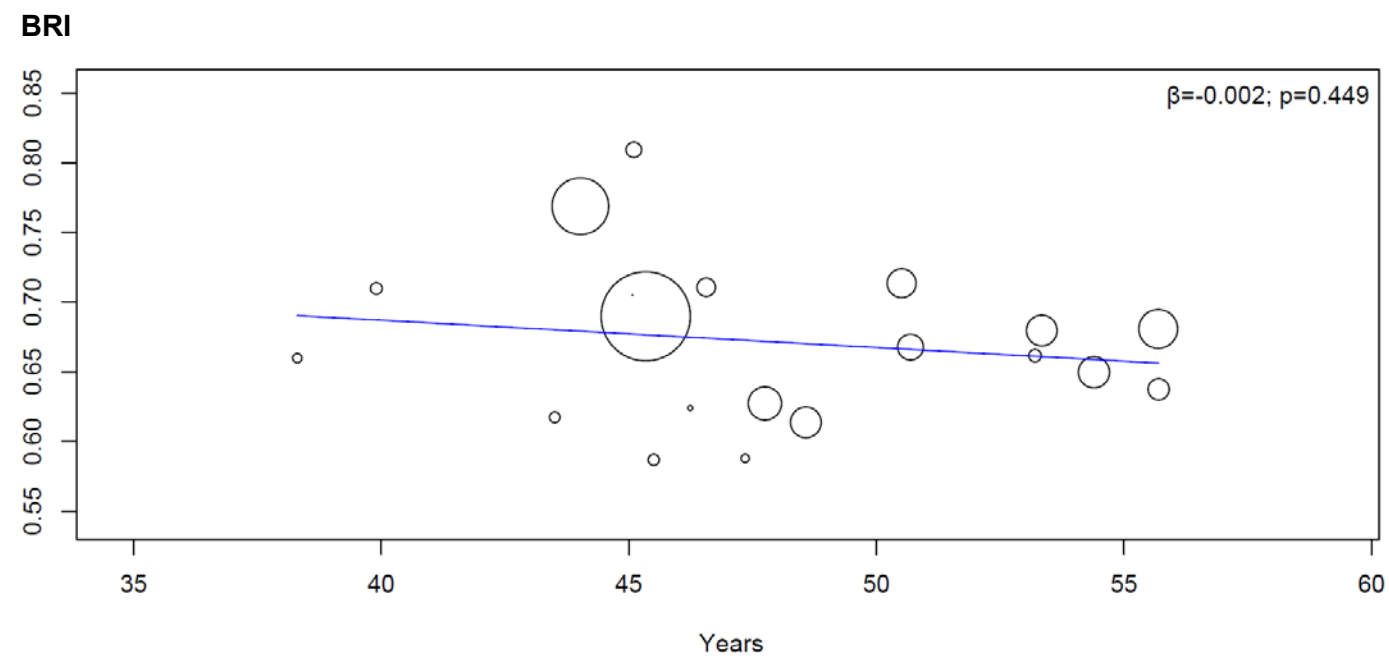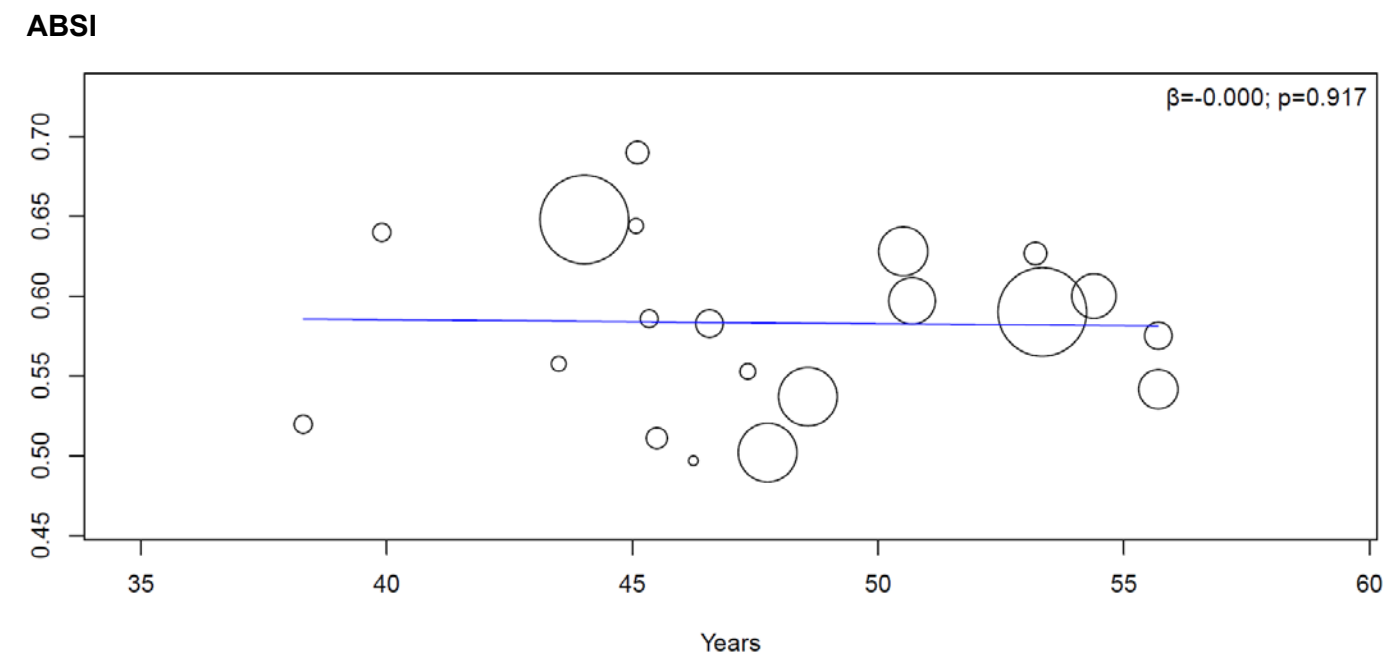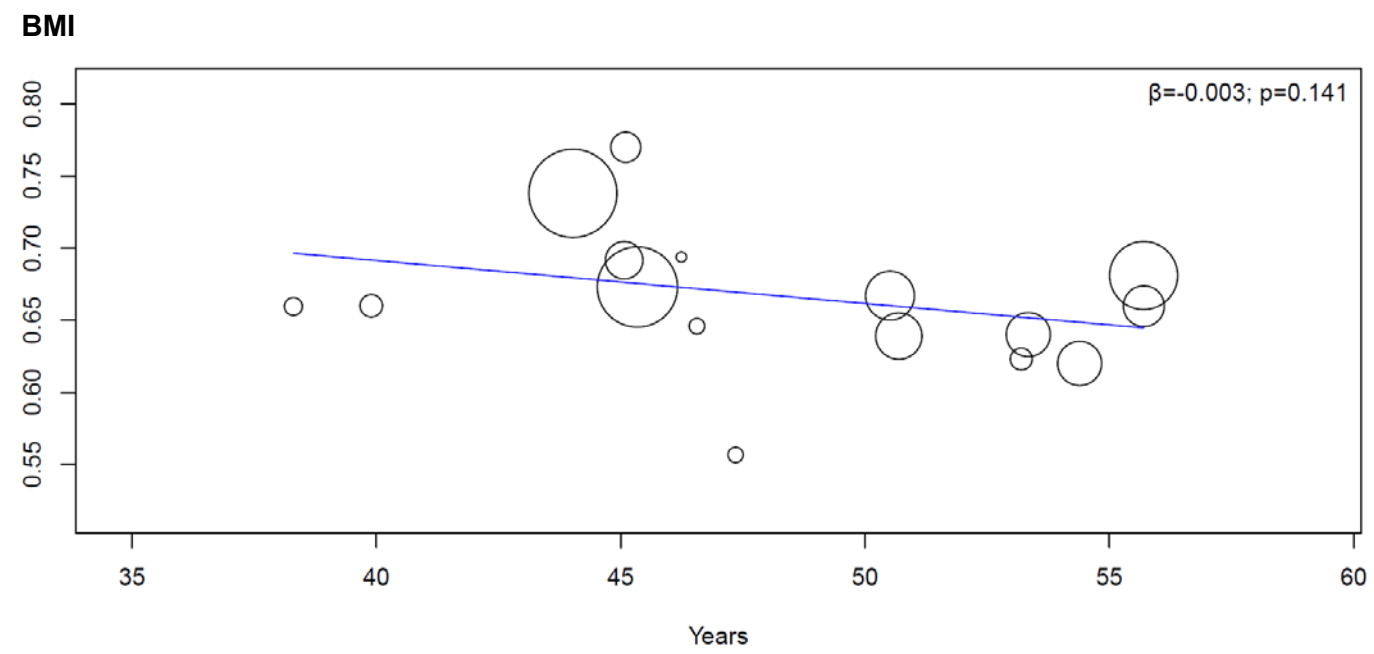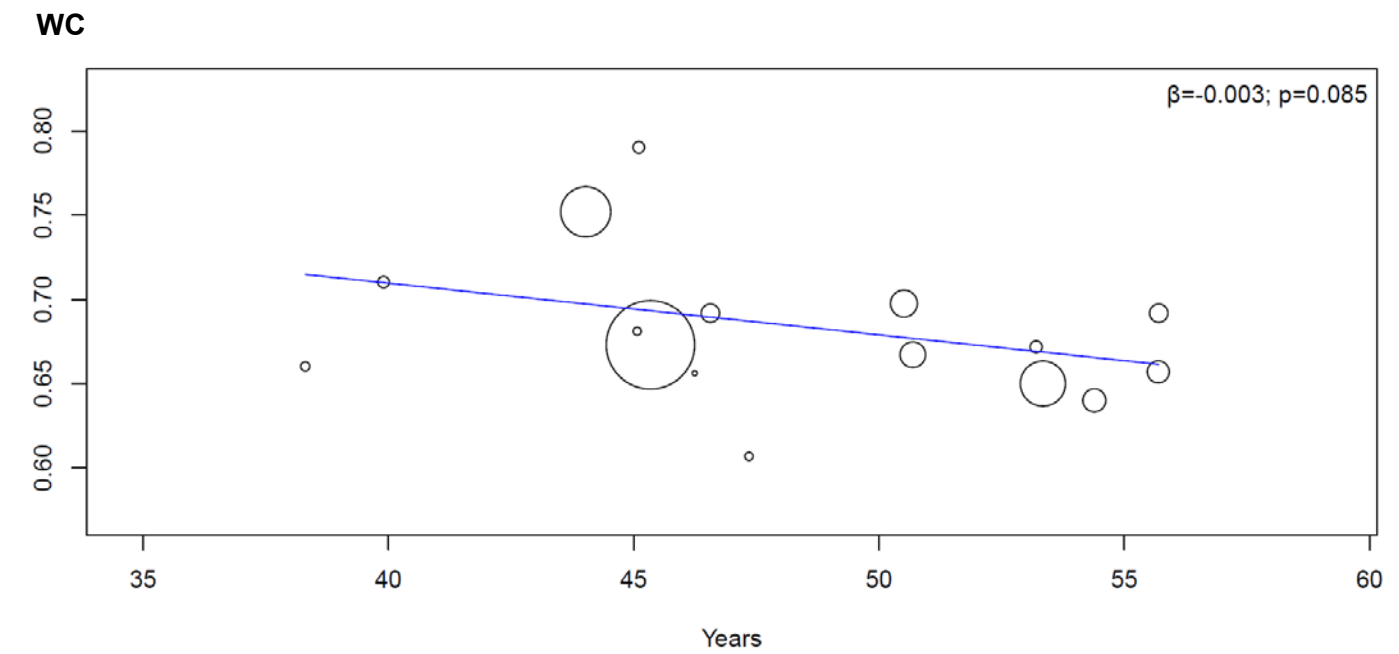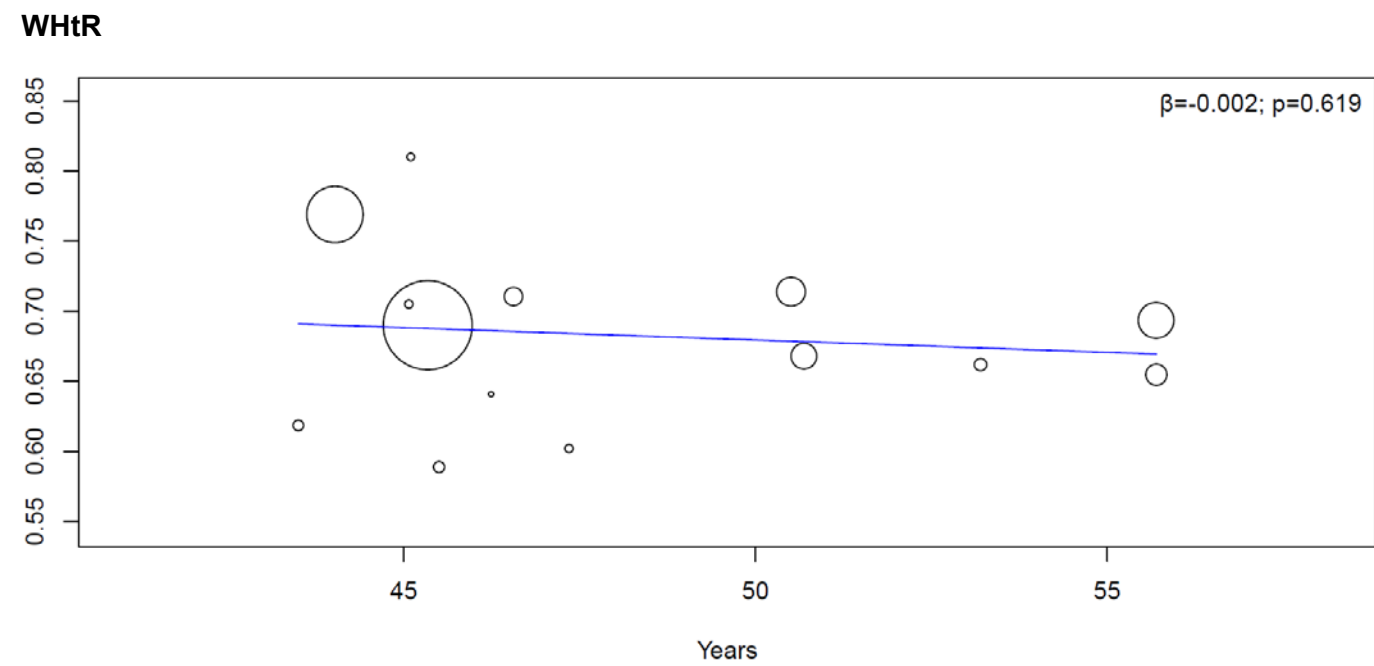

**Figure S1.** Random effect meta-regression model in the total population for BRI, ABSI, BMI, WC and WHtR.

**BRI**

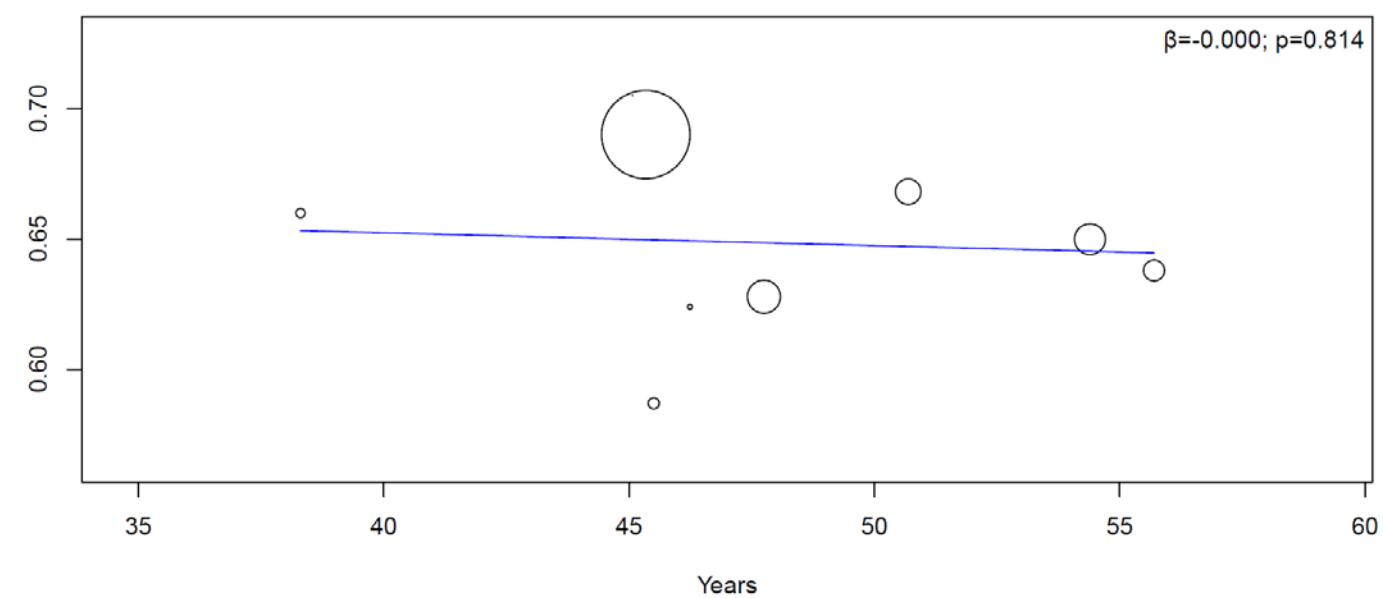

**ABSI**

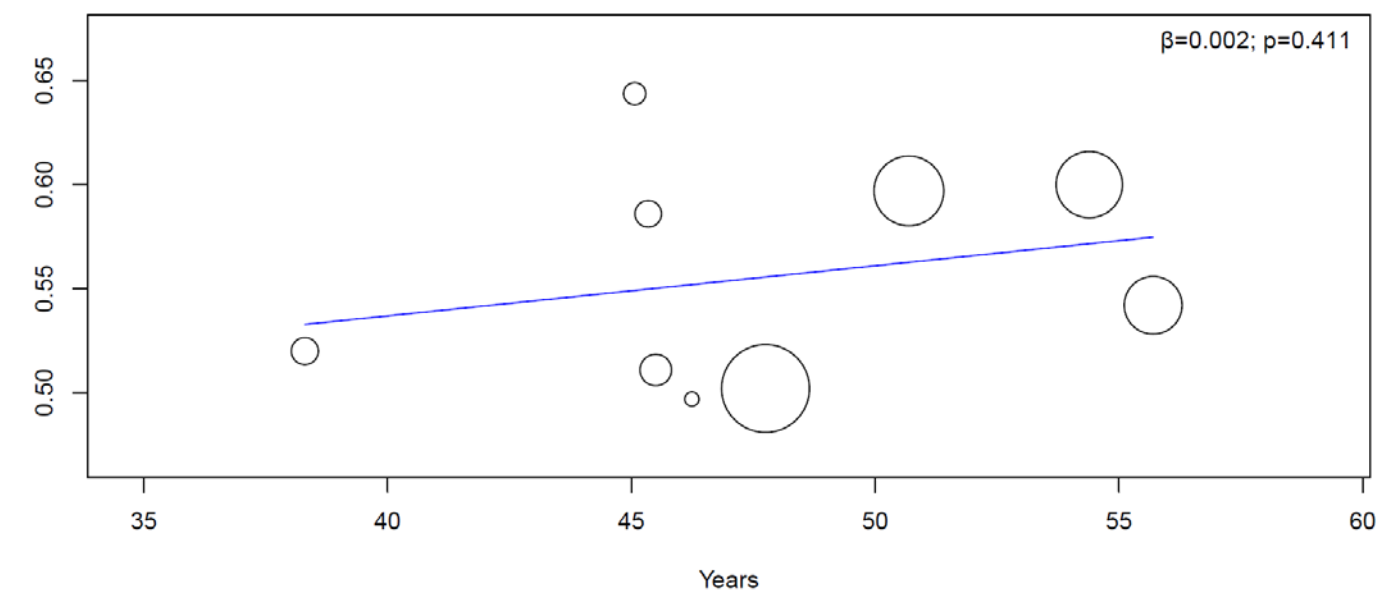

**BMI**

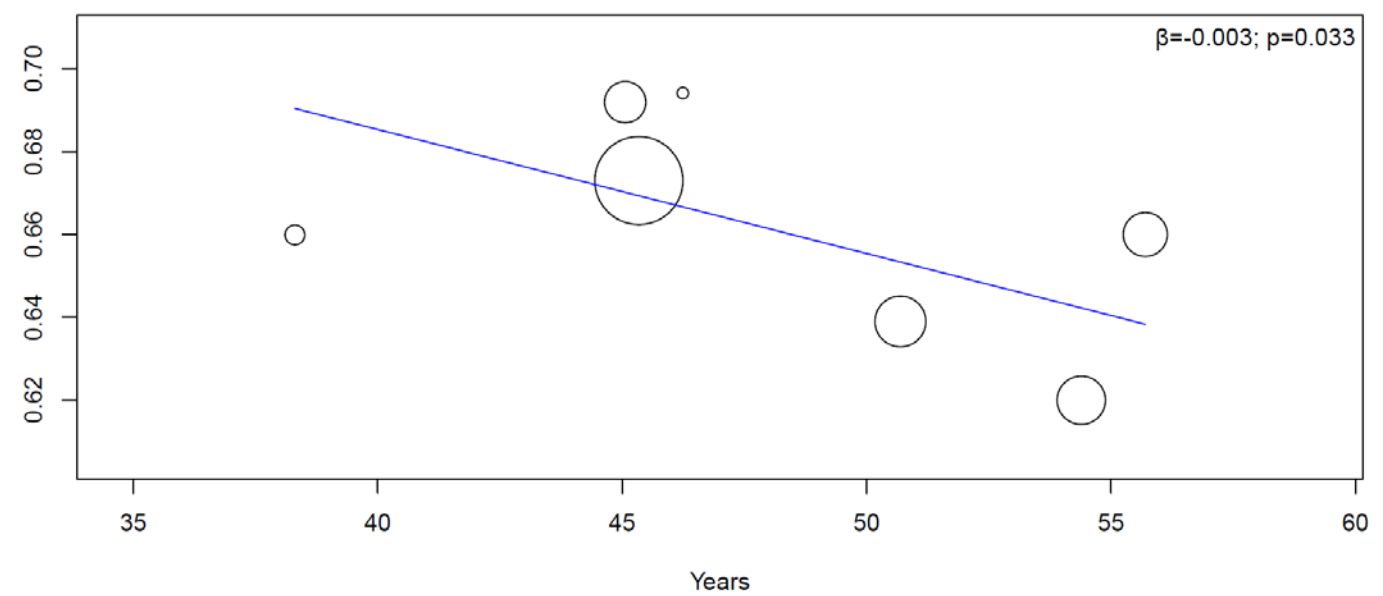

**WC**

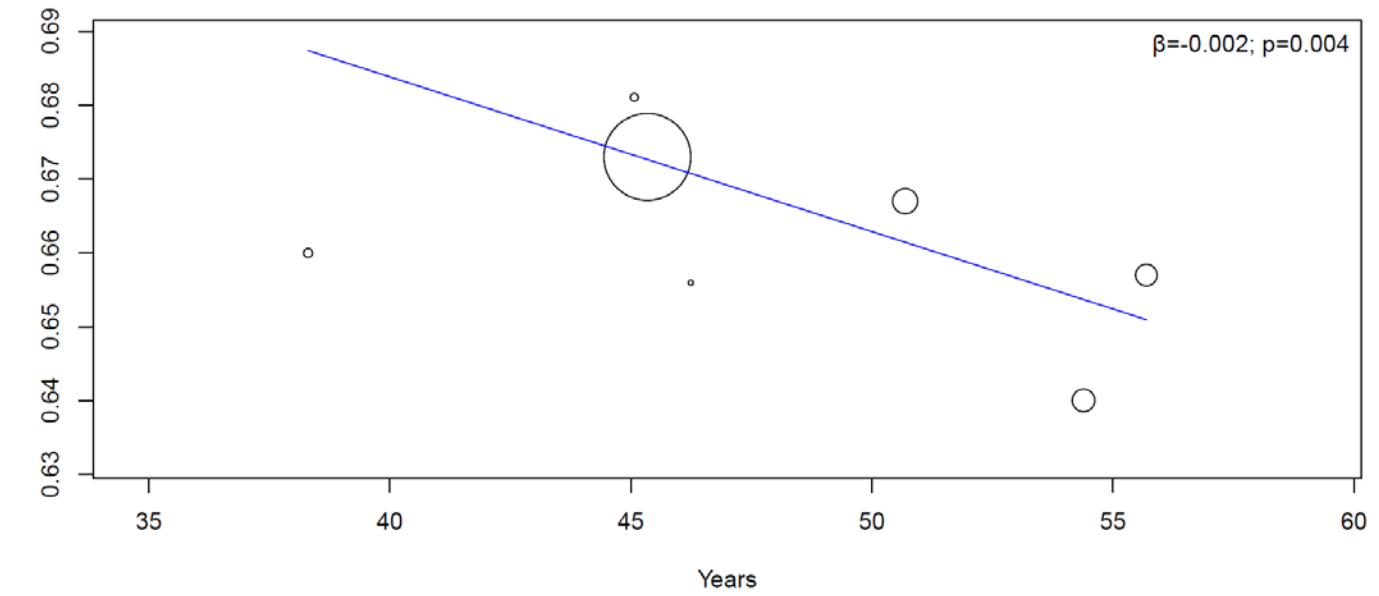

**WHtR**

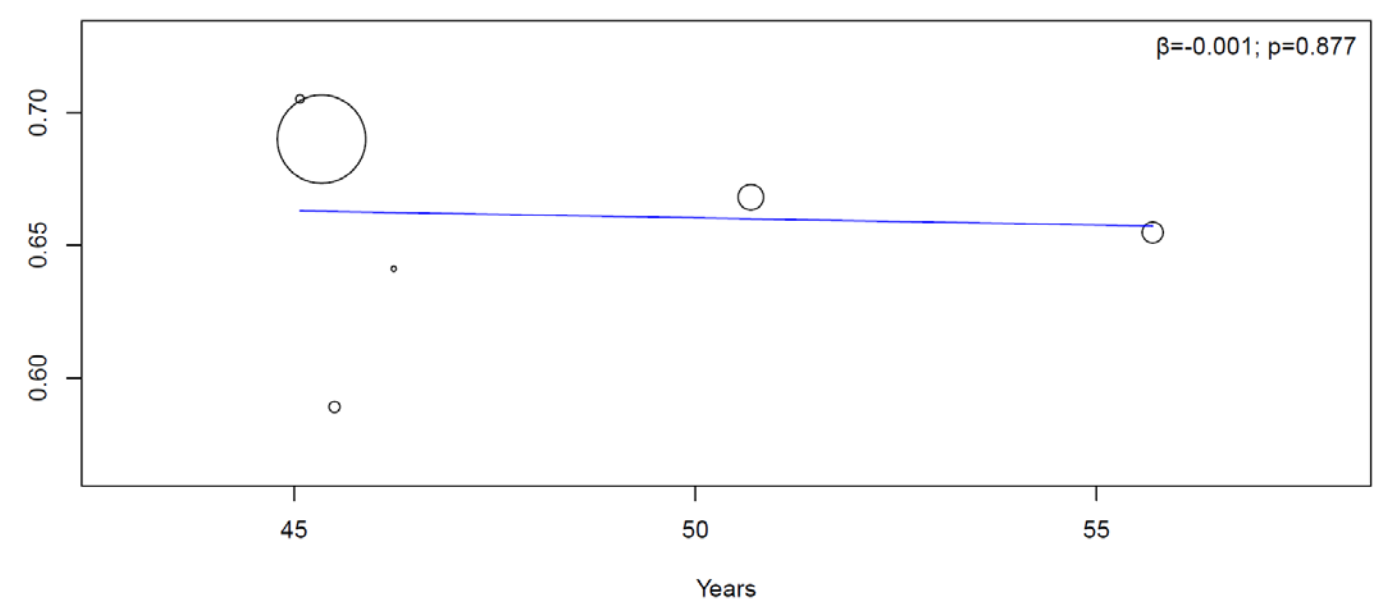

**Figure S2.** Random effect meta-regression model in men for BRI, ABSI, BMI, WC and WHtR.

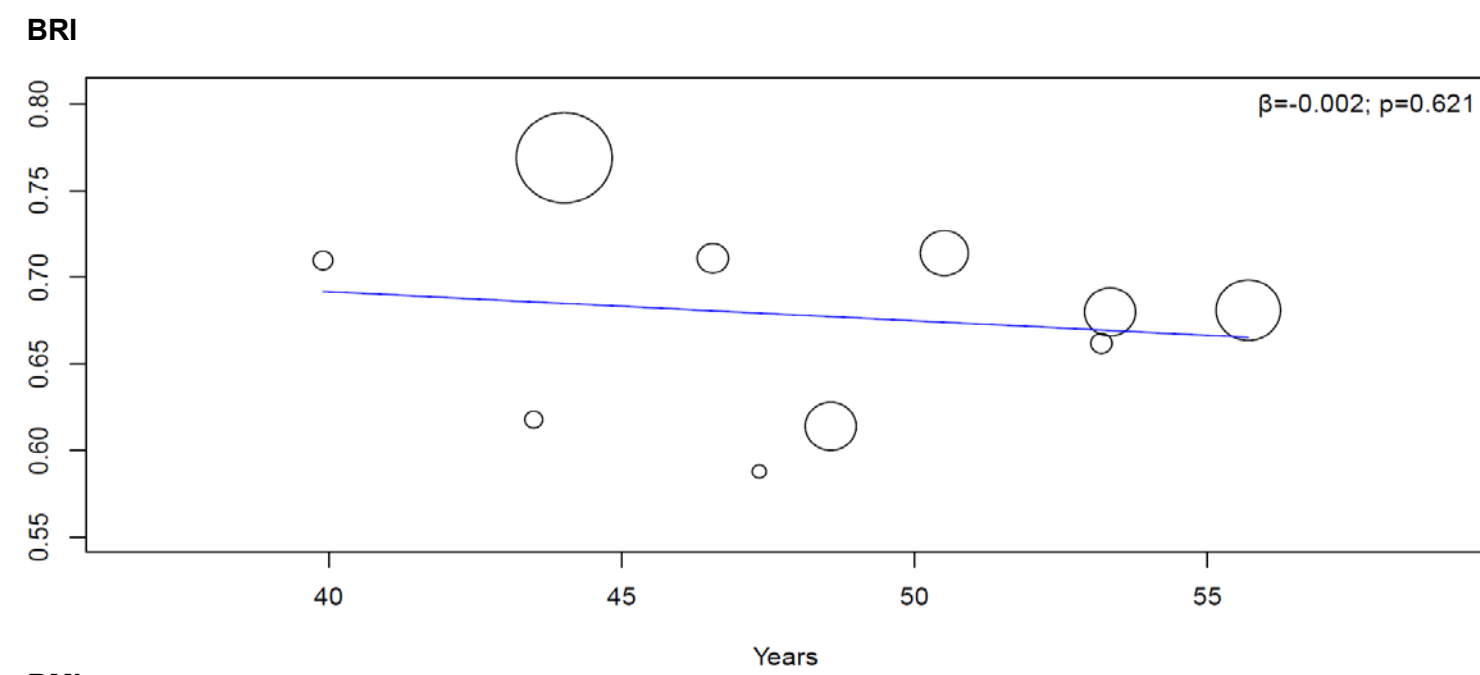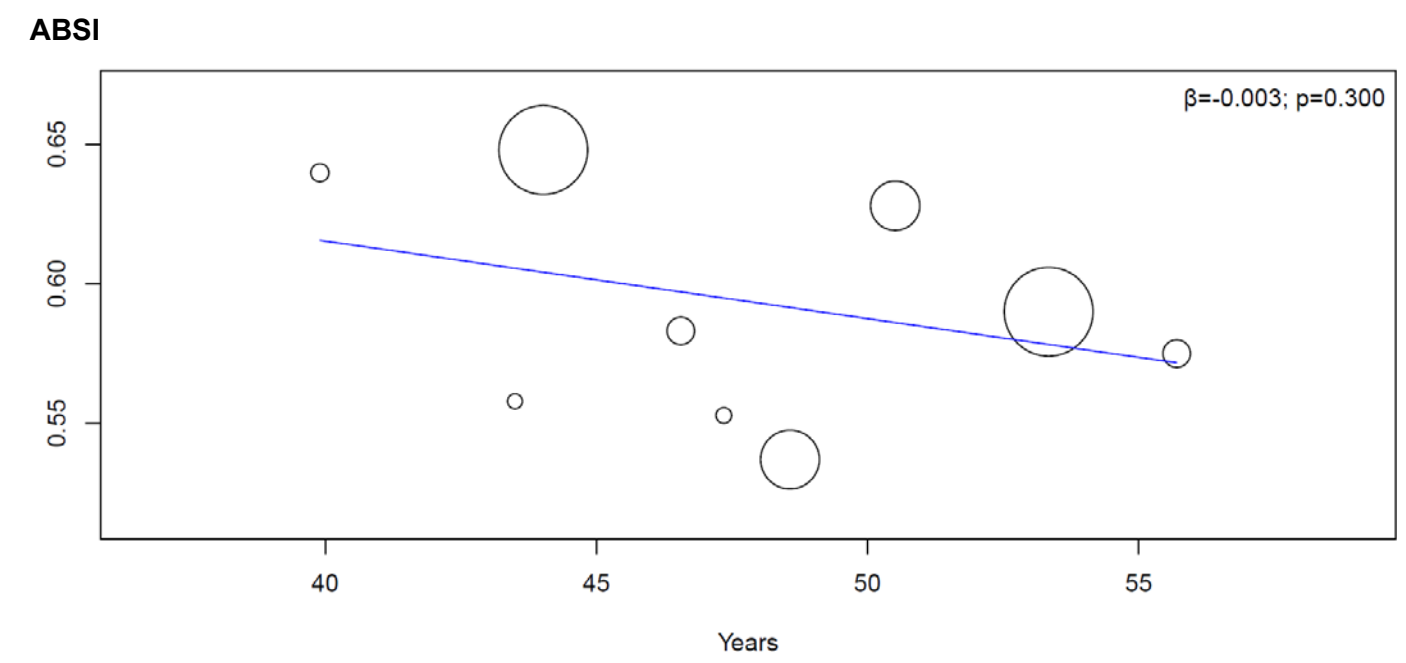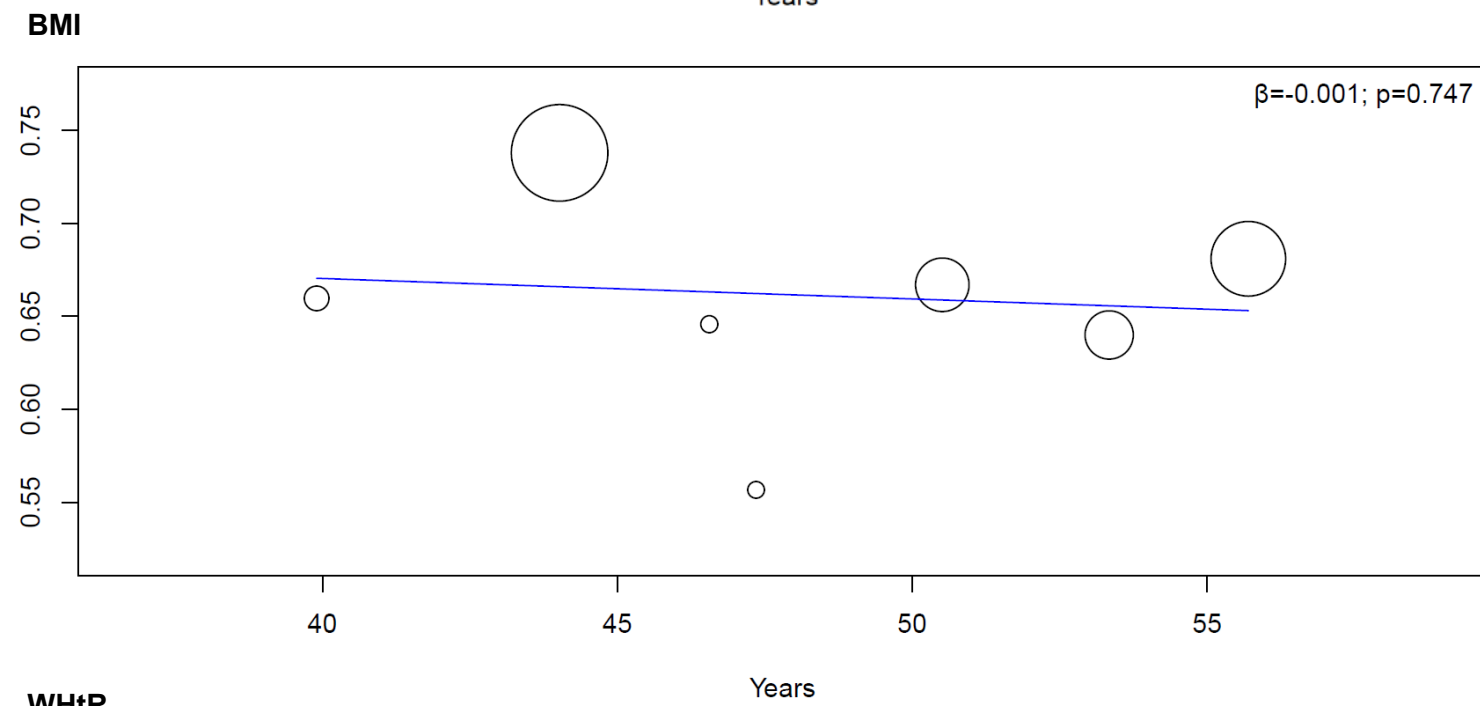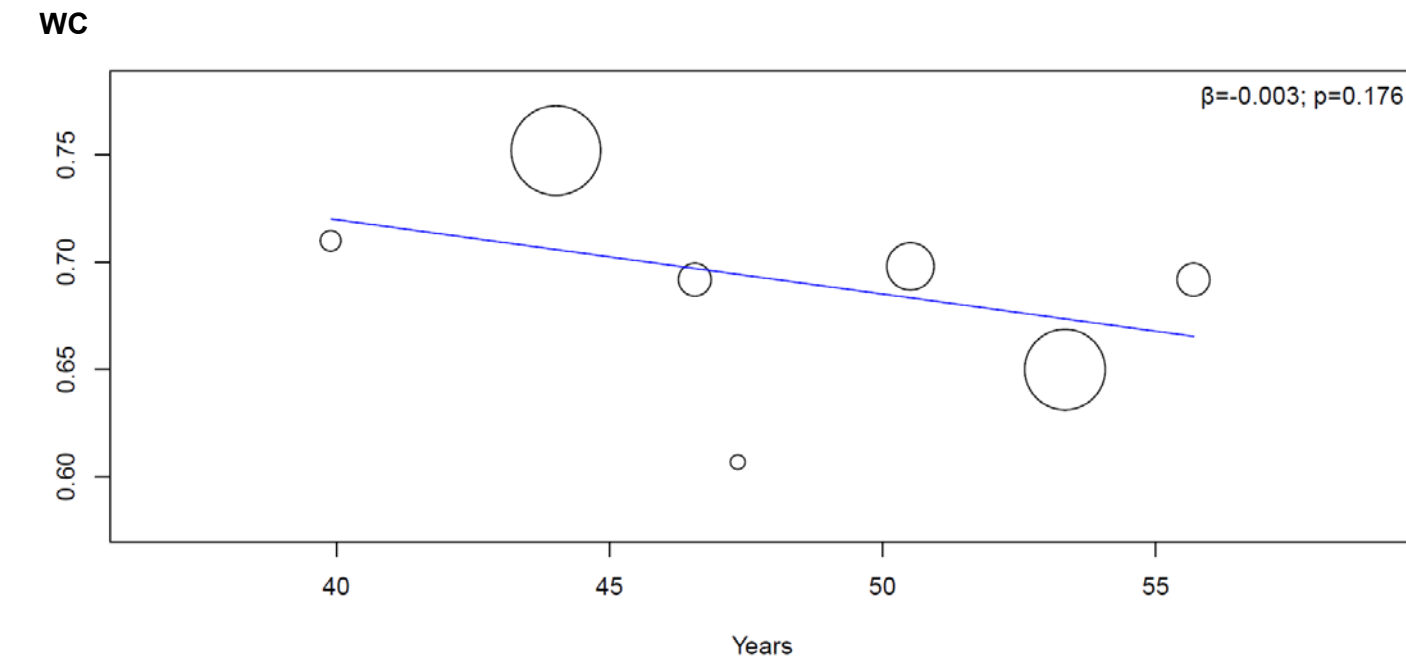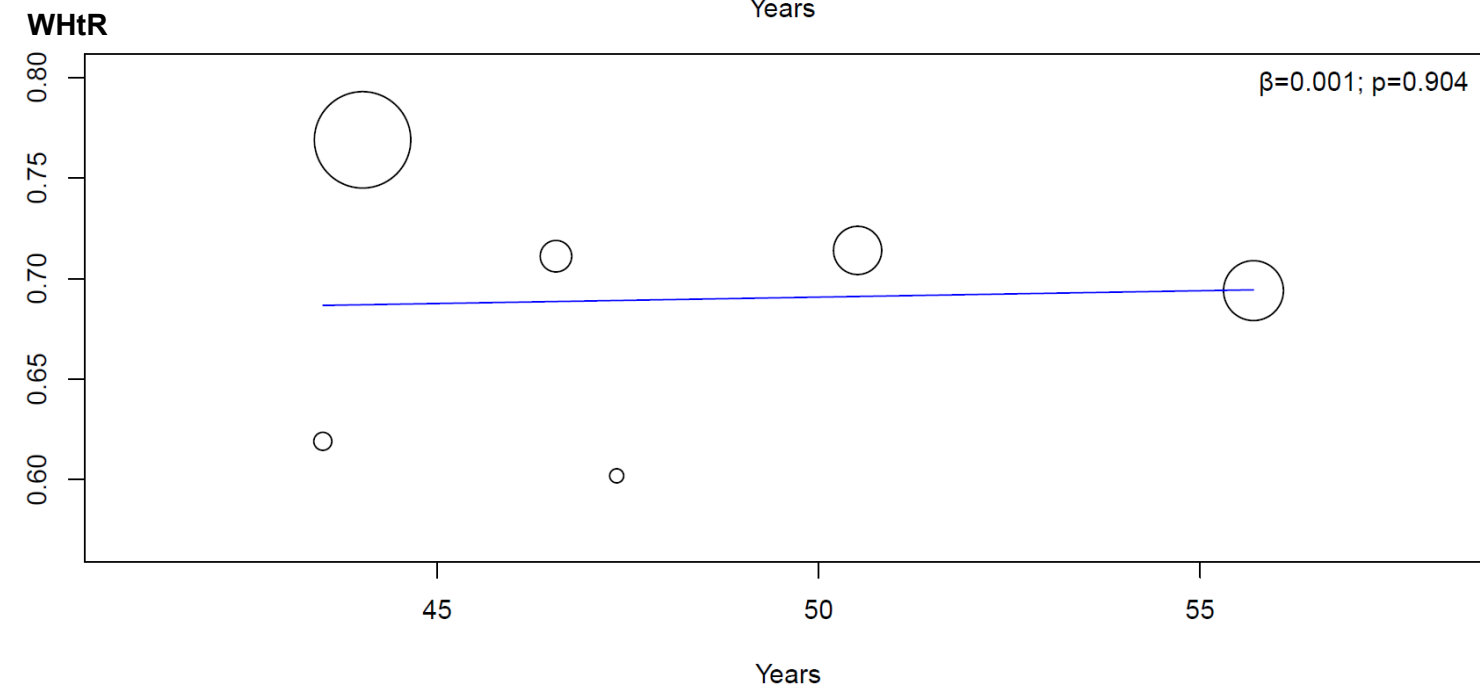

**Figure S3.** Random effect meta-regression model in women for BRI, ABSI, BMI, WC and WHtR.

BRI

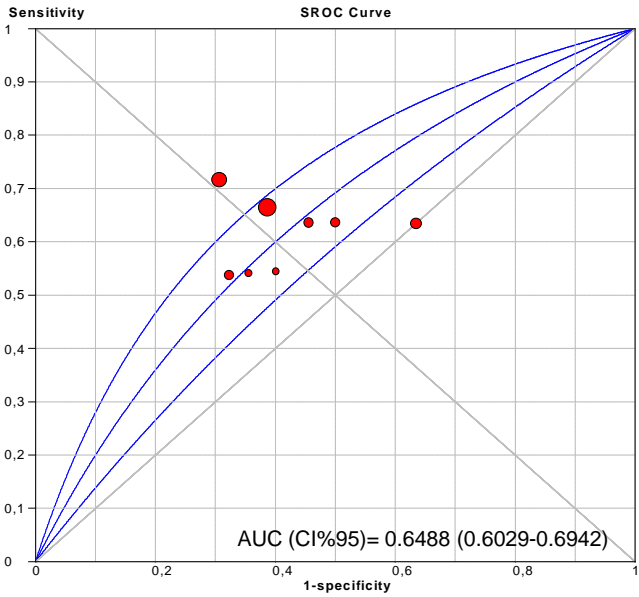

ABSI

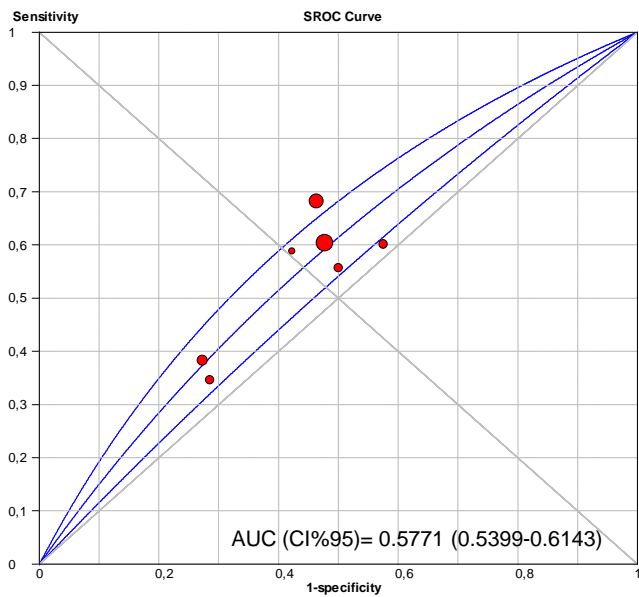

BMI

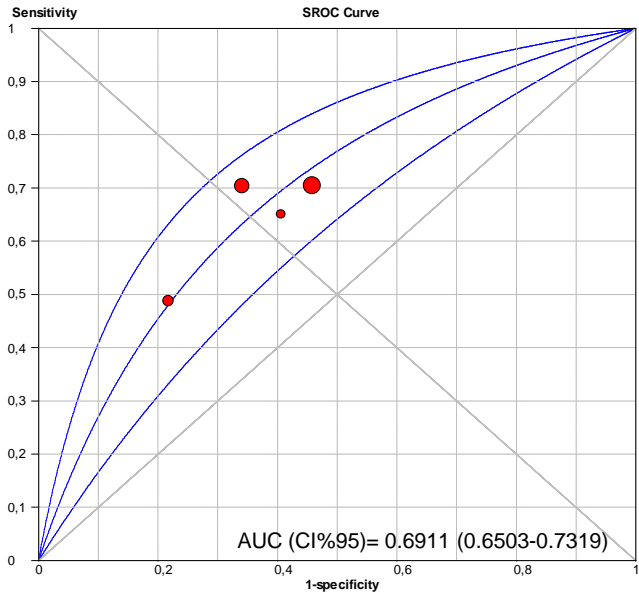

WC

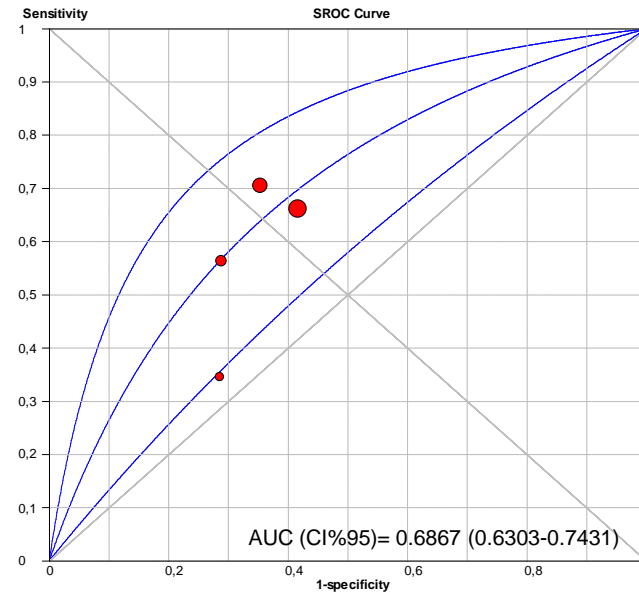

WHtR

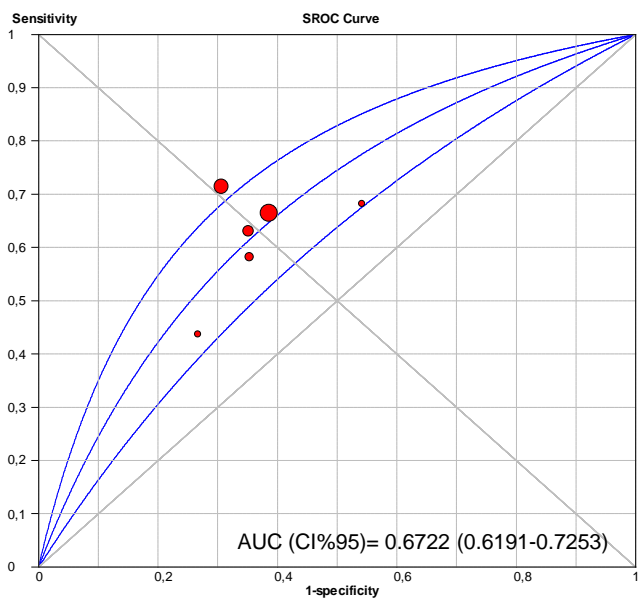

**Figure S4.** Estimated pooled AUC-SROC in the total population for BRI, ABSI, BMI, WC and WHtR.

BRI

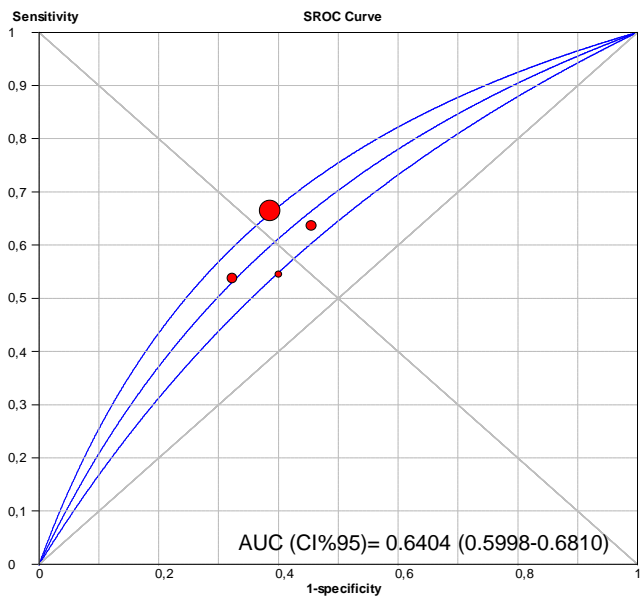

ABSI

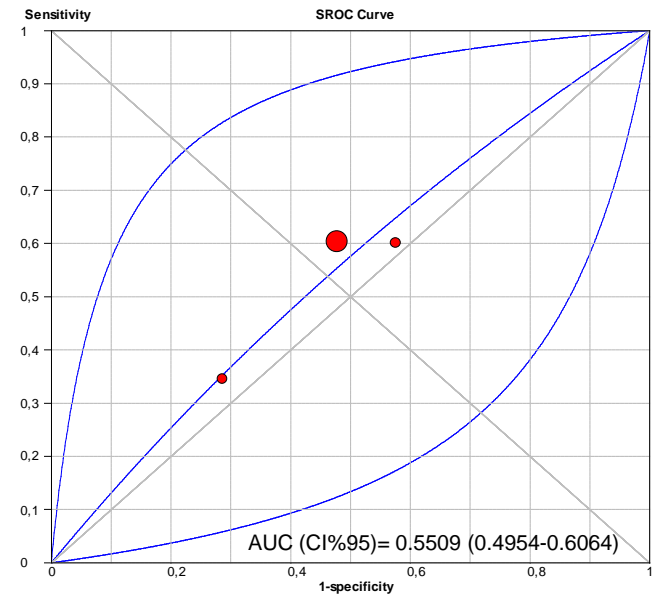

WHtR

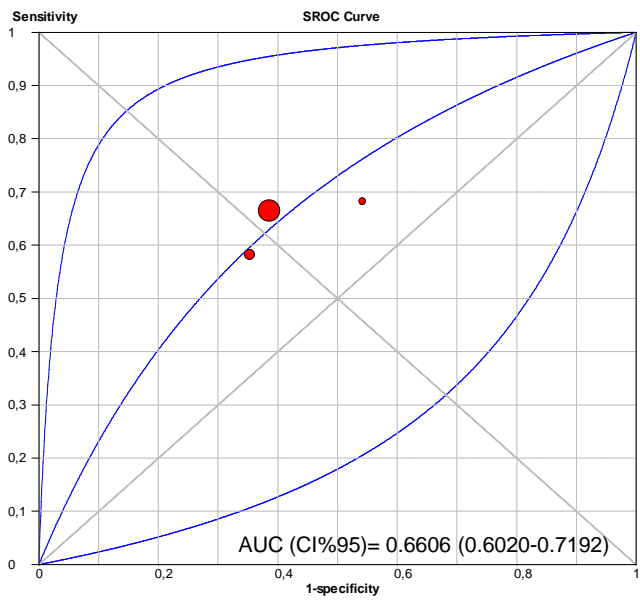

Figure S5. Estimated pooled AUC-SROC in men for BRI, ABSI and WHtR.

BRI

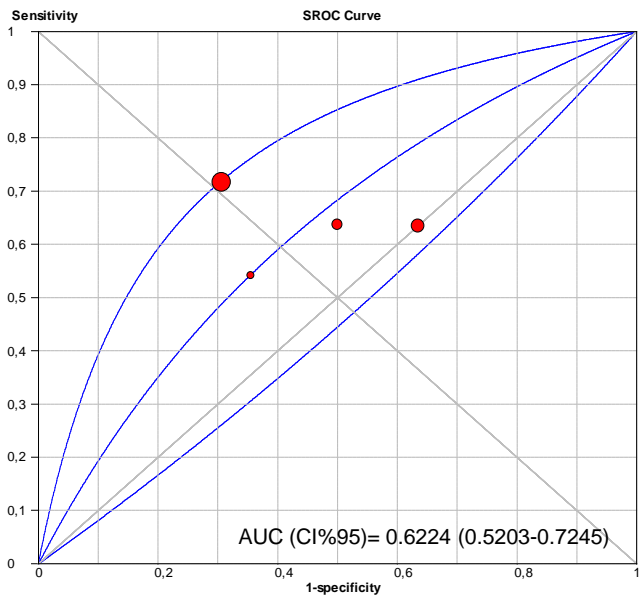

ABSI

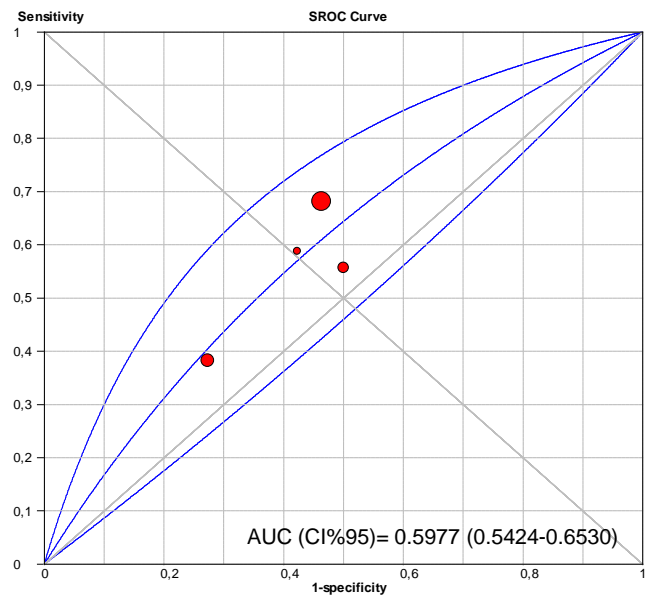

WHtR

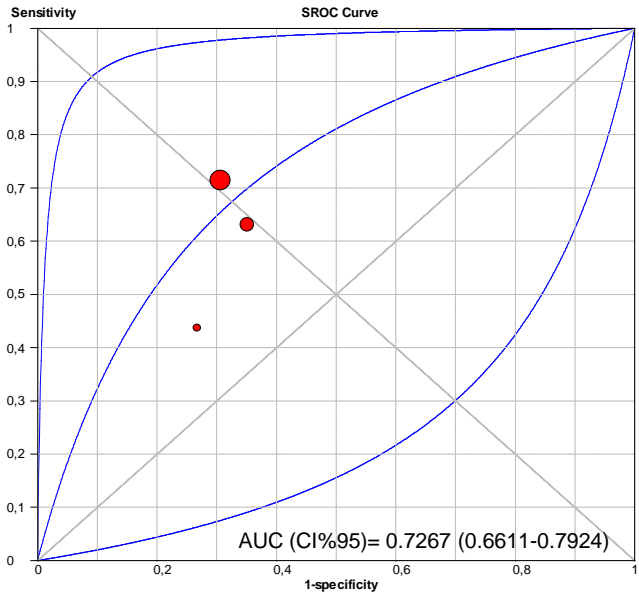

**Figure S6.** Estimated pooled AUC-SROC in women for for BRI, ABSI and WHtR.
